# Supplementary material for: A straightforward and sensitive “ON–OFF” fluorescence immunoassay based on silicon-assisted surface enhanced fluorescence
Source: Royal Society of Chemistry journal article supplement (doi:10.1039/d0ra08759a), 2021-01-01
Supplement: d0ra08759a1.pdf [file d0ra08759a1.pdf]

## Supporting Information

### **A straightforward and sensitive “ON-OFF” fluorescence immunoassay based on silicon-assisted surface enhanced fluorescence**

*Ruohu Zhang, Zhanrui Jin, Zhengqiu Tian, Yingzhou Liu, Zhengqi Lu, Yiping Cui\**

Advanced Photonics Center, Southeast University, Nanjing 210096, Jiangsu, China

Email: [cyp@seu.edu.cn](mailto:cyp@seu.edu.cn)

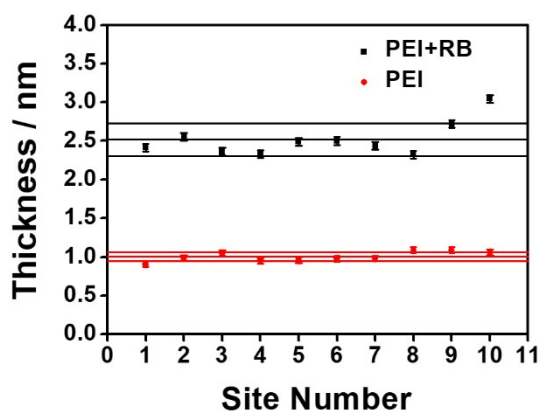

Fig. S1. The thickness of the PEI layer with (black) and without (red) RB attachment, each measured from ten different sites. For each sample, the straight lines indicate the mean and the standard deviation calculated from ten different sites.

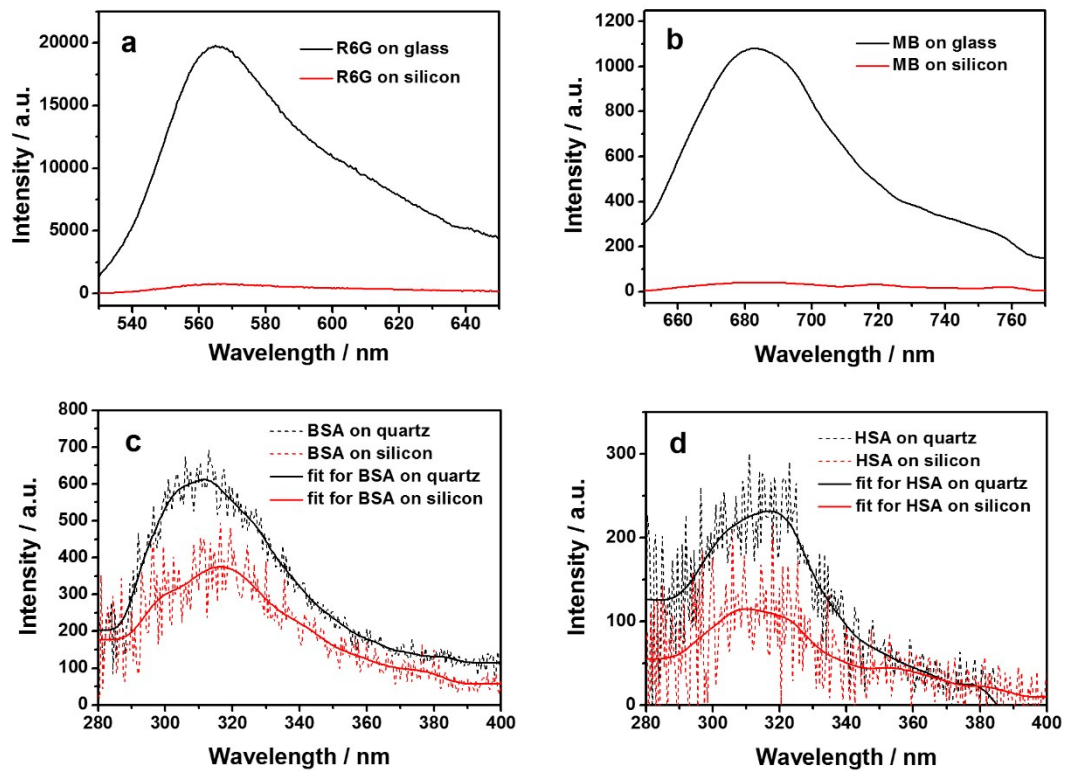

Fig. S2. The fluorescence spectra of different molecules on the surface of glass (quartz) substrates and silicon substrates: (a) R6G, (b) MB, (c) BSA and (d) HSA.
